# Supplementary material for: Identification of a Novel RAMA/RON3 Rhoptry Protein Complex in Plasmodium falciparum Merozoites
Source: Front Cell Infect Microbiol. 2021 Jan 18;10:605367. doi: 10.3389/fcimb.2020.605367 (PMC7848174; doi:10.3389/fcimb.2020.605367)
Supplement: Supplementary file 3 [file Table_2.xlsx]

## Sheet: Sheet1
Supplementary Table 2. Mascot search results of LC-MS/MS data obtained from immunoaffinity-purified proteins with monoclonal antibodies raised aganist Plasmodium falciparum schizont lysates.
mAbs	Protein	PlasmoDB ID	Amino acid position (Start - End)	Peptide sequences identifieda
4F6	PfRAP2	PF3D7_0501600	52 - 71	LSMWVYFIYNHFSSADELIK
			76 - 91	TNINTLENSDHTCFAR
			107 - 119	SMLSTDDYQSFFK
			122 - 140	FKDINPLFINDFILILNDK
			124 - 140	DINPLFINDFILILNDK
			124 - 141	DINPLFINDFILILNDKK
			141 - 152	KFMENLDLYIMK
			183 - 192	SNPYFIVGSR
			193 - 206	VHTPYKDYLGDFNK
			207 - 217	YTEISVLNYVR
			218 - 228	DYNFLIYAGSR
			229 - 241	ENYYNSDIAGPAR
			283 - 301	SEYYGTPDDLITSFFSIIK
			314 - 322	QFDYALFHK
			323 - 330	TYSIPNLK
	PfRAP1	PF3D7_1410400	104 - 123	SASAAAILEEDDSKDDMEFK
			131 - 143	TSTPSGTQTSGLK
			181 - 199	SASVAGIVGADEEAPPAPK
			200 - 219	NTLTPLEELYPTNVNLFNYK
			220 - 233	YSLNNMEENINILK
			234 - 253	NEGDLVAQKEEFEYDENMEK
			243 - 253	EEFEYDENMEK
			320 - 331	TFSGIGFNLTEK
			335 - 369	VLGVGVTYQEYPETMLYNCPNNSNLFDTIESLQGR
			377 - 388	ESMISTTFEQQK
			432 - 446	FHPNIDYLTLADGYK
			450 - 466	NDIYELSHVNFCLLNPK
			489 - 524	YKENFDNFMSISITCHIESLIYDDIEASQDIAAVLK
			491 - 524	ENFDNFMSISITCHIESLIYDDIEASQDIAAVLK
			530 - 540	LHVITSGLSYK
			548 - 562	IYSEIQKNPDELYEK
			555 - 562	NPDELYEK
			563 - 574	LTWIYDNIYMIK
			619 - 633	NVIVYNAIISGIHEK
			644 - 658	HNFLLDYHFNSIFEK
			689 - 701	TMVTIINDYFEAK
			712 - 725	MKTDMLSLQNEESK
			714 - 725	TDMLSLQNEESK
1C2	PfRhopH2	PF3D7_0929400	52 - 64	YLYMDEYLSEGDK
			52 - 69	YLYMDEYLSEGDKATFEK
			130 - 148	GSQNTEGESEVPSDDEINK
			170 - 188	VHDFLVLTSQSNENLLPNK
			191 - 200	LFEQIVDQIK
			201 - 212	YFDEYFFASGGK
			222 - 229	YNFLDIYK
			296 - 308	YIISDDLYYVNMK
			388 - 396	QLDDEEIER
			397 - 411	FLIDLNFFLYNGFLR
			445 - 456	TQYEENKLSEYR
			466 - 475	VSNITNDMIK
			530 - 542	DCNVNQNFTETSK
			555 - 571	FGWFYIHPNEVINSINK
			602 - 631	IVEIINLSLEVDKSPDSLDFSIPMNFFNHK
			644 - 665	LLTSYEYIDSIANNYFFLSEYK
			713 - 728	YNASYAYFTLMNMIGK
			818 - 829	ILGLLTVTLWAK
			833 - 845	KSVYYDDDVSLYR
			834 - 845	SVYYDDDVSLYR
			870 - 879	SCDISQYGIK
			927 - 934	LPLEDYYK
			972 - 985	VTDAIDVYDFFYIK
			972 - 986	VTDAIDVYDFFYIKK
			995 - 1003	EYNEFLQDK
			1010 - 1027	ELETILNNSPFSEEQTMK
			1045 - 1061	ILWMHASSNLGTGTYLK
			1174 - 1188	QPYYLMSNVPLNNPK
			1193 - 1207	LFVTEGTLEYLLLDK
	Clag9	PF3D7_0935800	35 - 63	SILDNDELYNSLSNLENLLLQTLEQDELK
			116 - 131	TQITLEYKPEISDMLK
			145 - 154	FMQTPMSAYK
			347 - 354	YQMELYSK
			385 - 393	ECNIYESDR
			412 - 421	FSQENDPVSK
			422 - 437	VVDPFNLFTNYFYFIK
			1244 - 1254	EGAYEEAMVSR
			1259 - 1269	ENVVQEVQEDK
	PfRhopH3	PF3D7_0905400	111 - 122	EYEEPFVNPVMK
			130 - 144	LFFTYNFGDVEPQGK
			178 - 186	YQLNKEEYK
			187 - 200	VFLSSVGSQMTAIK
			344 - 369	NLIFLSFHDDIPNNPYYNVELQEIVK
			402 - 425	ELSHNITDFSFKEDNSEIQCQNVR
			490 - 502	QLLNMESMISLTR
			660 - 673	TMYLDFESSDIFSR
			674 - 688	EKVFTALYNFDSFIK
			676 - 688	VFTALYNFDSFIK
			793 - 823	STSAASTSDEISGSEGPSTESTSTGNQGEDK
			793 - 830	STSAASTSDEISGSEGPSTESTSTGNQGEDKTTDNTYK
			824 - 845	TTDNTYKEMEELEEAEGTSNLK
4E6	PfRhopH3	PF3D7_0905400	52 - 81	GNGPDAGSFLDFVDEPEQFYWFVEHFLSVK
			103 - 122	SWVSEFLKEYEEPFVNPVMK
			111 - 122	EYEEPFVNPVMK
			130 - 144	LFFTYNFGDVEPQGK
			178 - 186	YQLNKEEYK
			201 - 212	NLYSTVEDEQRK
			288 - 296	NPYLDNFKK
			297 - 323	FMTNSDFTLIKPQSVWNVPIFDIYKPK
			324 - 338	NYLDSVQNLDTECFK
			344 - 369	NLIFLSFHDDIPNNPYYNVELQEIVK
			381 - 389	LYNFFFVFK
			402 - 425	ELSHNITDFSFKEDNSEIQCQNVR
			414 - 425	EDNSEIQCQNVR
			490 - 502	QLLNMESMISLTR
			539 - 549	ASLHVPSVLYR
			633 - 641	MIHPNIVDR
			676 - 688	VFTALYNFDSFIK
			719 - 751	KQDVLYETDKPQTMDEASYEETVDEDAHHVNEK
			793 - 823	STSAASTSDEISGSEGPSTESTSTGNQGEDK
			793 - 830	STSAASTSDEISGSEGPSTESTSTGNQGEDKTTDNTYK
			824 - 845	TTDNTYKEMEELEEAEGTSNLK
			831 - 846	EMEELEEAEGTSNLKK
	Clag3.1	PF3D7_0302500	78 - 87	LILESLEKDK
			95 - 105	QGTEQLIDISK
			140 - 153	EQSIEIYNSDISDK
			169 - 178	LMLIPLNSYK
			198 - 214	EAQEESSPIGDHGTFFR
			261 - 294	FMENLDDITNQYGLGLINHLGPHLIALGHFTVLK
			328 - 343	VLDMMCDHESVYYSEK
			355 - 373	SNTSMECNILEYLLHYFNK
			424 - 439	EANEENTFPEQEEPNR
			556 - 565	FDEVPSMLQK
			566 - 572	FYVYLTK
			639 - 651	TVVTNYWYPSPIK
			639 - 652	TVVTNYWYPSPIKK
			816 - 831	NNFDDVLFFADIFNMR
			879 - 909	EVVDELYSIYNFNTDIFTDTSFLQTVYLLFR
			924 - 940	ISVNNVFFMNVANNYSK
			962 - 984	TMFAAFQMLFSTMLSNNVDNLDK
			1390 - 1415	MNEADSADSDDEKDSDTPDDELMISR
	Clag3.2	PF3D7_0302200	37 - 50	NENANVNTPENLNK
			51 - 62	LLNEYDNIEQLK
			80 - 89	LILESLEKDK
			97 - 107	QGTEQLIDISK
			112 - 135	.NITDADDETYIIPTVQSSFHDIVK
			142 - 155	EQSIEIYNSDISDK
			171 - 180	LMLIPLNSYK
			426 - 441	EANEENTFPEQEEPNR
			558 - 567	FDEVPSMLQK
			568 - 574	FYVYLTK
			818 - 833	NNFDDVLFFADIFNMR
			881 - 911	EVVDELYSIYNFNTDIFTDTSFLQTVYLLFR
			926 - 942	ISVNNVFFMNVANNYSK
			964 - 986	TMFAAFQMLFSTMLSNNVDNLDK
	Clag9	PF3D7_0935800	35 - 68	SILDNDELYNSLSNLENLLLQTLEQDELKIPIMK
			74 - 81	YLNMSNFK
			82 - 109	ILNELNADGAEKPYIIPTSNCSANDIVK
			145 - 154	FMQTPMSAYK
			412 - 421	FSQENDPVSK
			868 - 878	EVVNDFFVIYK
			1076 - 1085	FIPLVFYTLK
			1185 - 1197	AYAYFENVIFFLR
			1244 - 1254	EGAYEEAMVSR
1G5	PfRAMA	PF3D7_0707300	589 - 601	YLDDLIDEEQTIK
			589 - 605	YLDDLIDEEQTIKDAVK
			650 - 657	NIVDKEIK
			668 - 675	LQFNNTNK
			694 - 727	NNKFEQQNYDESYMDDDYEQNEEFNDNNQSEDMK
			697 - 727	FEQQNYDESYMDDDYEQNEEFNDNNQSEDMK
			697 - 734	FEQQNYDESYMDDDYEQNEEFNDNNQSEDMKETNELDK
			735 - 756	INDELLTDQGPNEDTLLENNNK
	PfRON3	PF3D7_1252100	374 - 388	NLGTGFFDFSNSLFK
			666 - 680	DLDINNVNYEEEMEK
			747 - 774	NPIGYQTSQLVFEPQNNHIGSLMVGSNK
			1558 - 1575	FLADSNIPSIPYQGFSVR
aAll the peptide sequences had a score greater than 27 indicating identity or extensive homology (P < 0.05).
Each peptide score is −10 × Log10(P), where P is the probability that the observed match is a random event.
RAP, rhoptry-associated protein; RhopH, high-molecular mass rhoptry protein complex; Clag, cytoadherence-linked asexual gene; RAMA, rhoptry-associated membrane antigen; RON, rhoptry neck protein.
